# Supplementary material
Source: HighWire-hosted journal article supplement (https://erj.ersjournals.com/content/55/4/1901977)
Supplement: inline-supplementary-material-1 [file inline-supplementary-material-1.pdf]

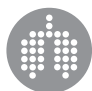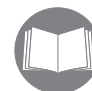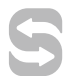

SHAREABLE PDF

# Sleep disorders and cerebrovascular disease: the long and winding road

Jean Louis Pepin<sup>1</sup> and Miguel Angel Martinez-Garcia<sup>2</sup>

**Affiliations:** <sup>1</sup>Université Grenoble Alpes, Inserm, CHU Grenoble Alpes, Grenoble, France. <sup>2</sup>Pneumology Dept, Polytechnic and University La Fe Hospital, Valencia, Spain.

**Correspondence:** Jean-Louis Pepin, Laboratoire EFCR, CHU Grenoble Alpes, CS10217, 38043 Grenoble Cedex 9, France. E-mail: JPepin@chu-grenoble.fr

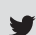

@ERSpublications

The association between stroke and OSA cerebrovascular disease <http://bit.ly/33ZnCKy>

**Cite this article as:** Pepin JL, Martinez-Garcia MA. Sleep disorders and cerebrovascular disease: the long and winding road. *Eur Respir J* 2020; 55: 1901977 [<https://doi.org/10.1183/13993003.01977-2019>].

This single-page version can be shared freely online.

A human being spends (or at least should spend) around a third of their life asleep. During normal sleep, physiological changes occur in the neurological, metabolic and cardiovascular systems, and these serve to maintain good health during waking hours [1]. Some specific diseases arise only during sleep, while others are most frequently identified, and most susceptible to aggravation, at night. The lifestyle imposed by our contemporary societies is not only associated with obesity and a diabetes epidemic but also with a massively increased prevalence of chronic sleep deprivation and sleep disorders, with an estimated one billion people suffering from sleep apnoea worldwide [2]. Insomnia and sleep disordered breathing are now two of the most common chronic diseases capable of aggravating the natural history of cardio-metabolic diseases.
